# Supplementary material for: Conversion of wheat straw to furfural and levulinic acid in a concentrated aqueous solution of betaïne hydrochloride
Source: Royal Society of Chemistry journal article supplement (doi:10.1039/c4ra03878a), 2014-06-19
Supplement: c4ra03878a1.pdf [file c4ra03878a1.pdf]

## Conversion of wheat straw to furfural and levulinic acid in a concentrated aqueous solution of betaine hydrochloride

Fei Liu<sup>a</sup>, Florent Boissou<sup>a,b</sup>, Anaïs Vignault<sup>a</sup>, Laurent Lemée<sup>a</sup>, Sinisa Marinkovic<sup>b</sup>, Boris Estrine<sup>b</sup>, Karine De Oliveira Vigier<sup>\*,a</sup> and François Jérôme<sup>a</sup>

<sup>a</sup> IC2MP, Institute of chemistry UMR CNRS 7285, Université de Poitiers, ENSIP, 1 rue Marcel Doré 86022 Poitiers

<sup>b</sup> Green chemistry ARD, Agro-Industrie Recherches et Développement F-51110 POMACLE, France; E-mail: b.estrine@a-r-d.fr

Corresponding author : Dr. Karine De Oliveira Vigier, E-mail: [karine.vigier@univ-poitiers.fr](mailto:karine.vigier@univ-poitiers.fr)

**Analysis of furfural after its extraction with diethyl ether when wheat straw was converted at 180°C for 1 hour under microwave irradiations (250 W): Two technics were employed LC-MS and GC-MS analyses.**

- LC-MS QToF Impact HD (Bruker Daltonique) , selected-ion monitoring (SIM)

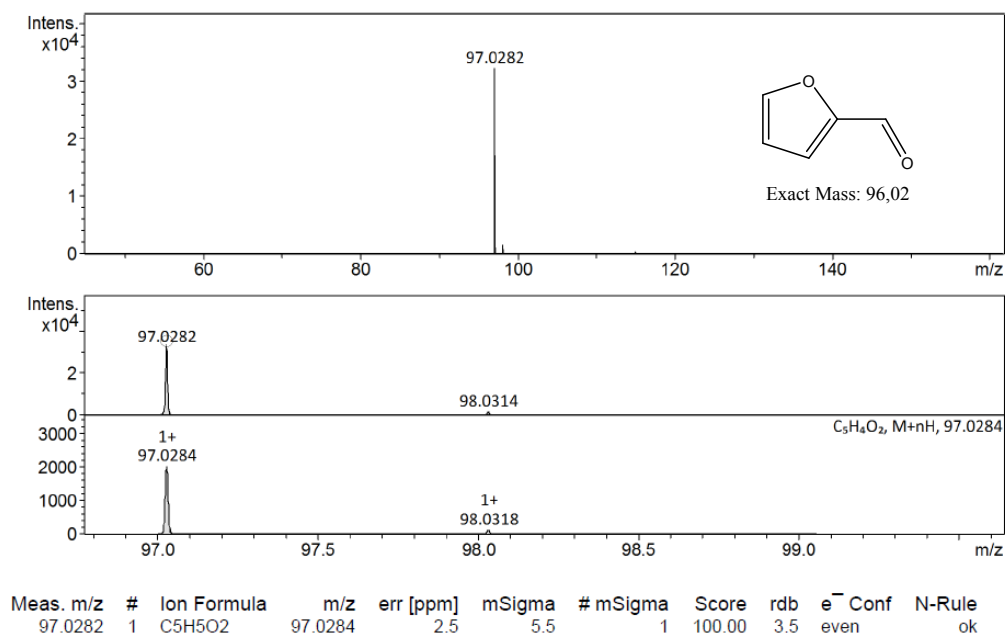

**Fig. S1** LC-MC analysis of furfural after its extraction

- GC-MS

GC/Mass Q-TOF "exact mass"

GC: 7890A Agilent, column HP 5 ms 30X0.25X0.25

Mass: 7200 Agilent

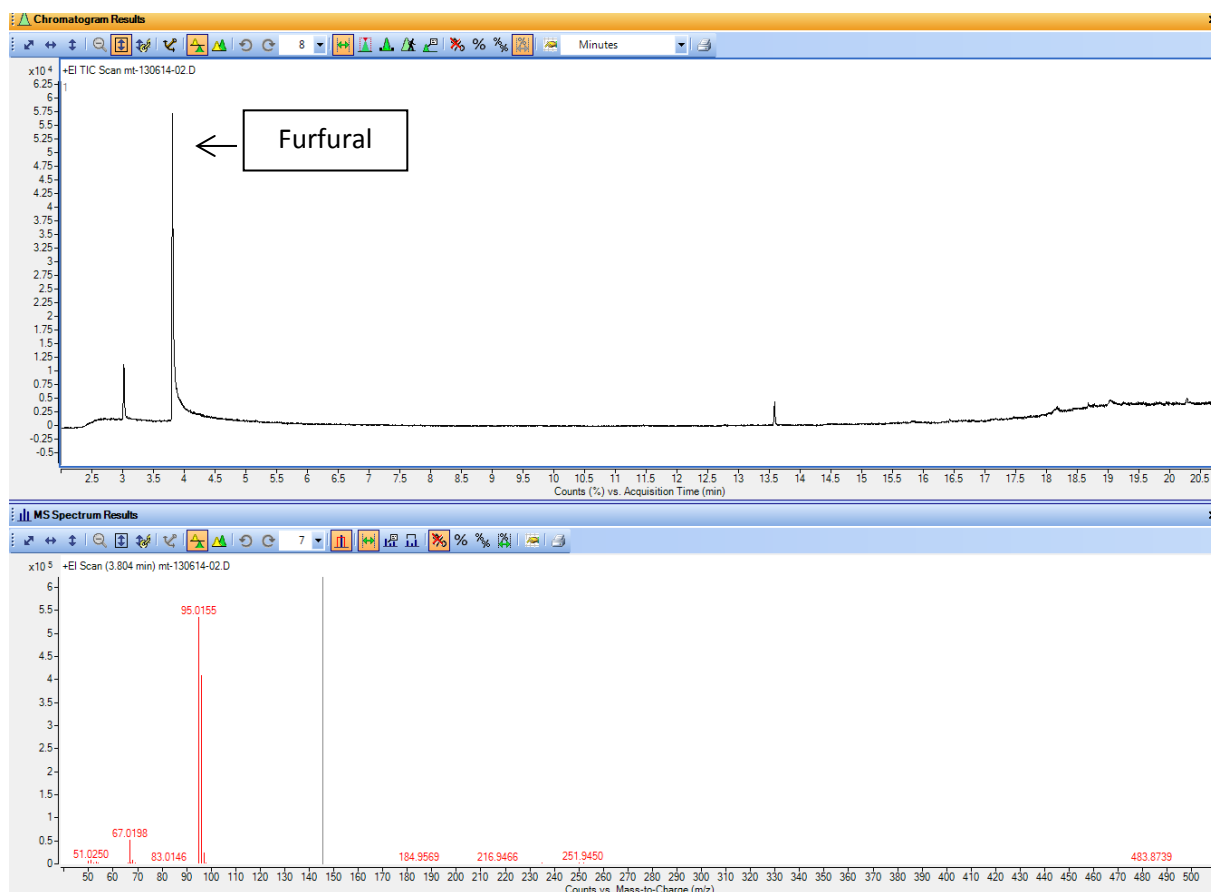

**Fig. S2** GC-MS analysis of furfural after its extraction

**Analysis of levulinic acid and 5-hydroxymethylfurfural by LC-MC analysis when wheat straw was converted at 180°C for 1 hour under microwave irradiations (250 W):**

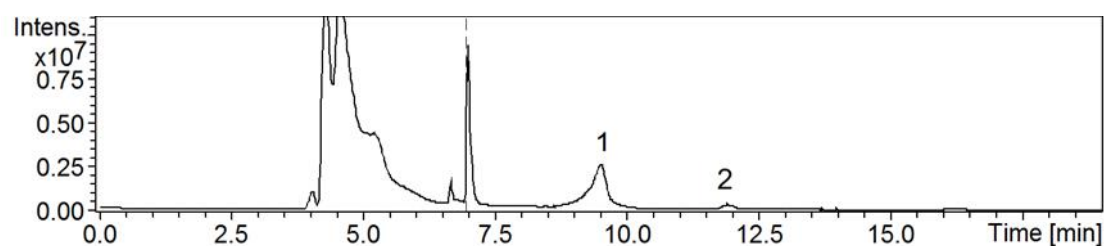

|             |         |                      |          |                  |           |
|-------------|---------|----------------------|----------|------------------|-----------|
| Source Type | ESI     | Ion Polarity         | Positive | Set Nebulizer    | 0.7 Bar   |
| Focus       | Active  | Set Capillary        | 3800 V   | Set Dry Heater   | 200 °C    |
| Scan Begin  | 50 m/z  | Set End Plate Offset | -500 V   | Set Dry Gas      | 4.0 l/min |
| Scan End    | 800 m/z | Set Charging Voltage | 2000 V   | Set Divert Valve | Waste     |
|             |         | Set Corona           | 0 nA     | Set APCI Heater  | 0 °C      |

**Levulinic acid (1):**

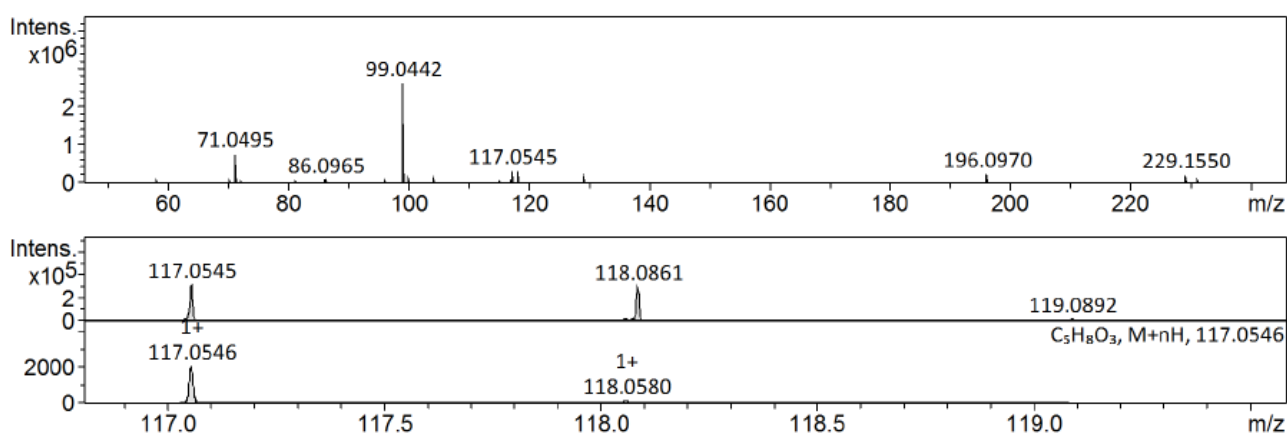

| Meas. m/z | # | Ion Formula | m/z      | err [ppm] | mSigma | # mSigma | Score  | rdB | e <sup>-</sup> Conf | N-Rule |
|-----------|---|-------------|----------|-----------|--------|----------|--------|-----|---------------------|--------|
| 71.0495   | 1 | C4H7O       | 71.0491  | -4.9      | 1.8    | 1        | 100.00 | 1.5 | even                | ok     |
| 99.0442   | 1 | C5H7O2      | 99.0441  | -1.7      | 3.4    | 1        | 100.00 | 2.5 | even                | ok     |
| 117.0545  | 1 | C5H9O3      | 117.0546 | 1.2       | 4.4    | 1        | 100.00 | 1.5 | even                | ok     |

**Fig. S3** LC-MC analysis of levulinic acid

## 5-Hydroxyméthylfurfural (2):

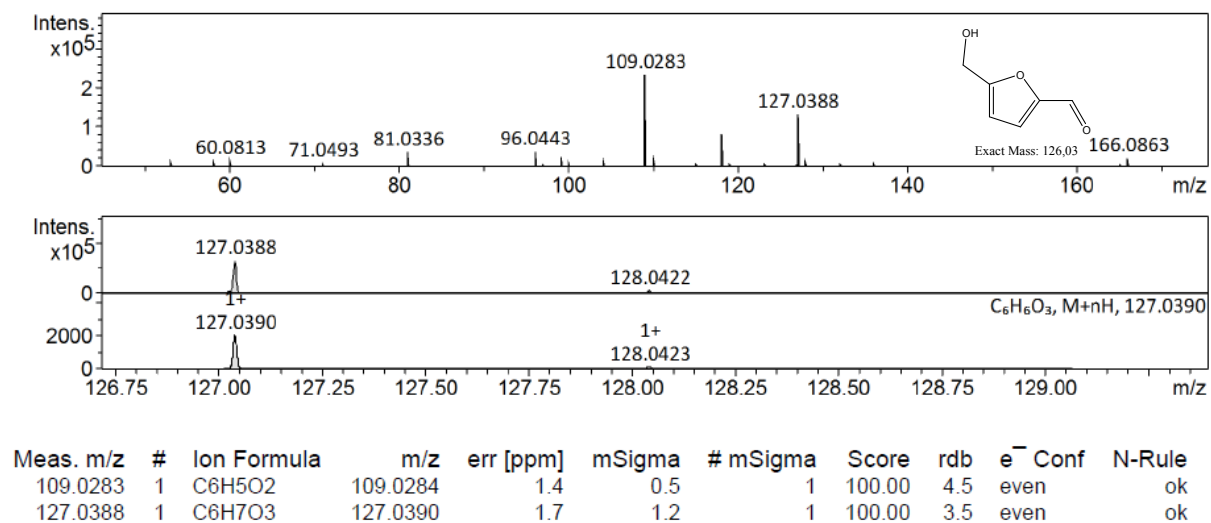

**Fig. S4** LC-MC analysis of 5-hydroxyméthylfurfural

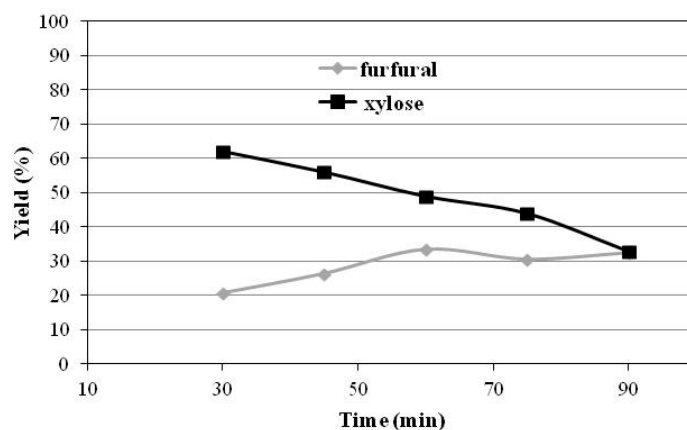

**Fig. S5** Tandem hydrolysis/dehydration of xylan originated from beechwooch in the presence of an aqueous solution BHC. Xylan and BHC content of 10 wt% and 20 wt% respectively, 150°C

**$^1\text{H}$  NMR spectra :**  $^1\text{H}$ NMR are recorded on a 400 MHz Bruker Advance DPX spectrometer using DMSO as solvent.

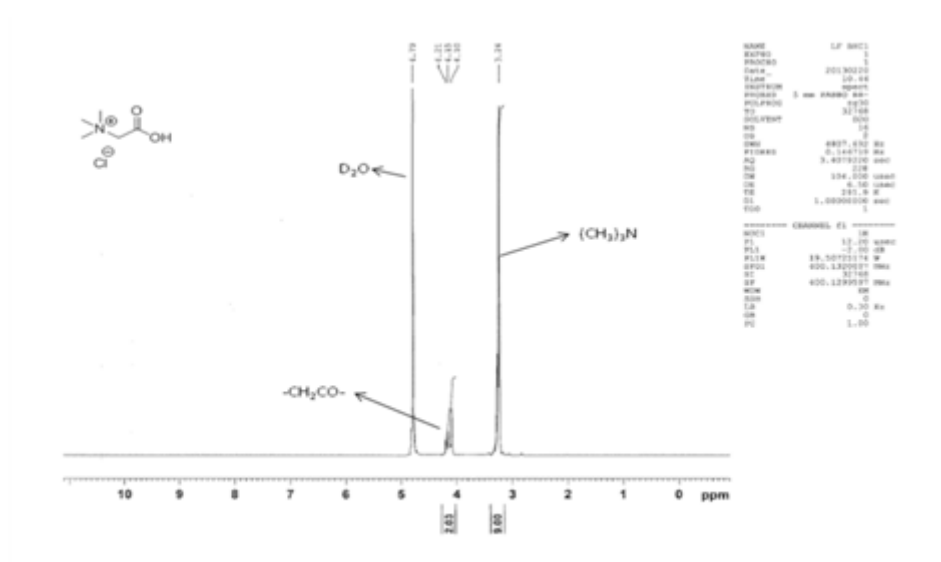

**Fig. S6**  $^1\text{H}$  NMR spectra of BHC recovered after the 6<sup>th</sup> cycle of recycling

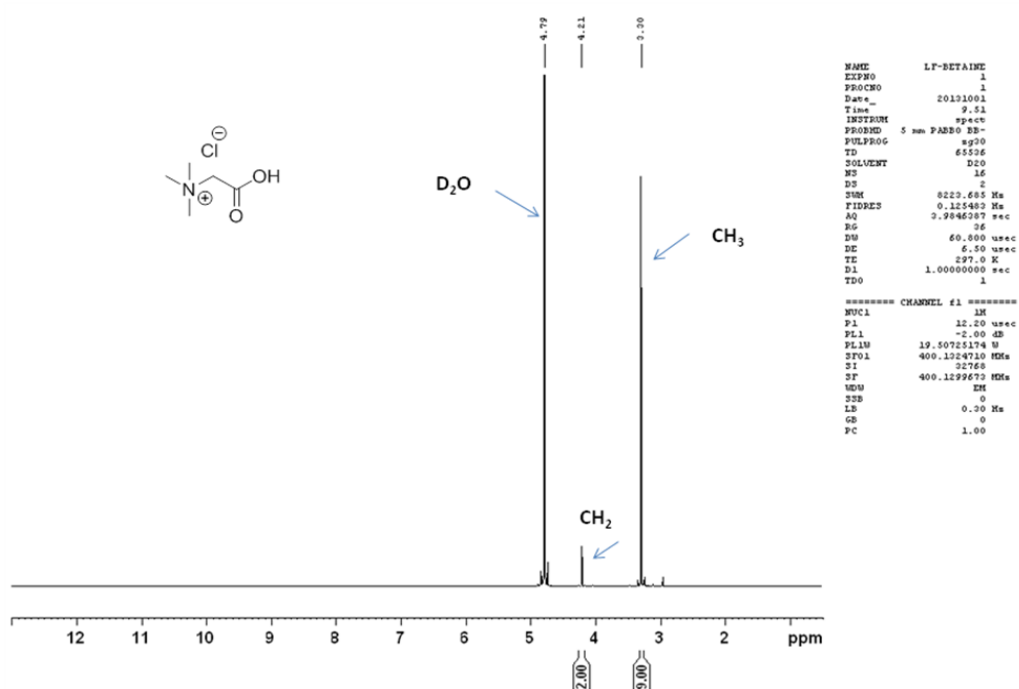

**Fig. S7:**  $^1\text{H}$  NMR spectra of BHC recovered after conversion of wheat straw

**Table S1 Hydrolysis of microcrystalline cellulose (AVICEL PH 200) in the presence of BHC<sup>a</sup>**

| Cellulose (wt%)  | Yield to levulinic acid(%) |
|------------------|----------------------------|
| 1,3              | 64                         |
| 1,3 <sup>b</sup> | 65                         |
| 1,3 <sup>c</sup> | 75                         |
| 5                | 60                         |
| 10               | 60                         |
| 20               | 53                         |
| 30               | 48                         |

<sup>a</sup> BHC, 40wt%, MW 250 W, 10 mL of water, 200°C, t = 1 h, <sup>b</sup> T = 180°C t = 2 h, <sup>c</sup> cotton, T= 180°C, t= 2h

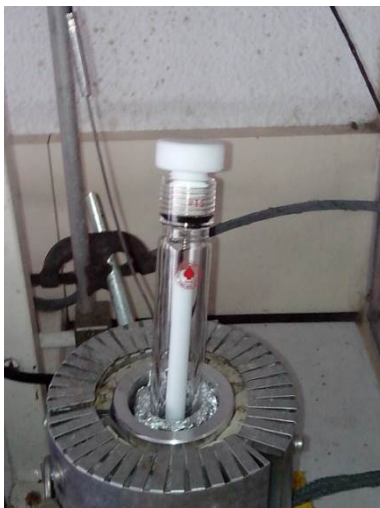

**Fig. S8:** Picture of the reactor used
